# Supplementary material for: Graphene oxide sensitizes cancer cells to chemotherapeutics by inducing early autophagy events, promoting nuclear trafficking and necrosis
Source: PubMed Central journal article supplement — Theranostics. 2018 Mar 28;8(9):2477–87. doi: 10.7150/thno.24173 (PMC5928903; doi:10.7150/thno.24173), 2018-03-28
Supplement: thnov08p2477s1.pdf [file thnov08p2477s1.pdf]

**Table S1. Putative proteins (≈35 kDa) co-precipitated with LC3**

| <b>Protein</b>          | <b>NCBI Reference Sequence</b> | <b>Score</b> |
|-------------------------|--------------------------------|--------------|
| histone H1.2            | NP_005310.1                    | 391          |
| histone H1.3            | NP_005311.1                    | 391          |
| histone H1.4            | NP_005312.1                    | 391          |
| unnamed protein product | BAG36431.1                     | 391          |
| liver histone H1e       | ABN72276.1                     | 391          |
| Histone cluster 1, H1e  | AAH96170.1                     | 391          |
| histone H1.5            | NP_005313.1                    | 330          |

**Table S2 Putative proteins (≈11 kDa) co-precipitated with LC3**

| <b>Protein</b>            | <b>NCBI Reference Sequence</b> | <b>Score</b> |
|---------------------------|--------------------------------|--------------|
| unnamed protein product   | CAA24918.1                     | 306          |
| HIST2H4B protein, partial | AAI28106.1                     | 306          |
| histone 1, H4c            | EAW55528.1                     | 306          |
| histone 1, H4e            | EAW55544.1                     | 306          |

The nuclear fractions were isolated from GO/CDDP-treated Skov-3 cells and same amount of proteins were subjected to immunoprecipitation using anti-LC3 MAb and Dynabeads® Protein A. The immunocomplex associated with LC3 was separated by 12% SDS-PAGE and the bands (≈11 kDa and ≈35 kDa) that were apparently upregulated after the GO/CDDP treatment were cut for LC/MS/MS analysis.

Table S1 shows putative proteins (≈35 kDa) with the highest scores (>300) after LC/MS/MS analysis and suggests that the protein was presumably histone H1.

Table S2 shows putative proteins (≈11 kDa) with the highest scores (>300) after LC/MS/MS analysis and suggests that the protein was presumably histone H4.

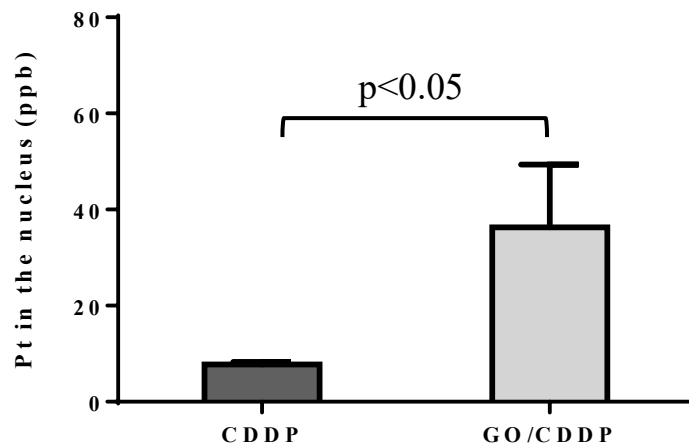

**Fig. S1.** To assess whether CDDP was concurrently transported into nucleus, we treated the Skov-3 cells with GO, CDDP or GO/CDDP as in Fig. 2A and separated the nuclear fractions, followed by ICP-MS analysis that detects the platinum in CDDP. As depicted in the figure, GO/CDDP triggered the nuclear import of significantly more CDDP than the CDDP group in Skov-3 cells.

## Supplementary Materials and Methods

### GO preparation and characterization

GO nanosheets (thickness < 2 nm) with characteristic functional groups and a lateral size of  $\approx 450$  nm in mean diameter (size range  $\approx 100$ -800 nm) were prepared as described [1] and dispersed in deionized water. Briefly, GO with a size of  $\approx 2.4$   $\mu\text{m}$  was first prepared from natural graphite by the modified Hummers method and dispersed in water. The solution was centrifuged ( $7,200 \times g$  for 5 min) to remove unexfoliated GO and byproducts and centrifuged again ( $400 \times g$  for 15 min) to remove broken fragments and debris. The pellet was dried under vacuum overnight, weighed on an ultra-micro balance with 0.1  $\mu\text{g}$  resolution and dissolved in deionized water ( $\approx 250$   $\mu\text{g ml}^{-1}$ ). The GO solution was tip sonicated (Misonix Sonicator 3000) in an ice bath at a power of 30 W for 1 h, filtered through a 0.45  $\mu\text{m}$  syringe filter and dried under vacuum overnight. The GO was characterized by atomic force microscopy, High-resolution X-ray photoelectron spectroscopy and Fourier transform infrared spectroscopy as described [1]. The GO nanosheet was weighed, reconstituted and well-dispersed in deionized water to  $\approx 250$   $\mu\text{g ml}^{-1}$ . The size distribution of GO was characterized using Dynamic Light Scattering (380 ZLS, Nicomp, USA) as described [1].

1. Chen G-Y, Yang H-J, Lu C-H, Chao Y-C, Hwang S-M, Chen C-L, et al. Simultaneous induction of autophagy and toll-like receptor signaling pathways by graphene oxide. *Biomaterials*. 2012; 33: 6559-69.
